# Supplementary material for: Dynamic reversible adhesives based on crosslinking network via Schiff base and Michael addition
Source: Royal Society of Chemistry journal article supplement (doi:10.1039/d2ra02299k), 2022-01-01
Supplement: d2ra02299k1.pdf [file d2ra02299k1.pdf]

**Supporting Information for**  
**Dynamic reversible adhesives based on crosslinking network via Schiff base and**  
**Michael addition**

Junyu Ren<sup>a</sup>, Hongxing Yang<sup>a</sup>, Yingchen Wu<sup>a</sup>, Sichen Liu<sup>a</sup>, Kelu Ni<sup>a</sup>, Xin Ran<sup>a</sup>,  
Xiaojian Zhou<sup>a</sup>, Wei Gao<sup>a</sup>, Guanben Du<sup>a,b,\*</sup>, Long Yang<sup>a,b,\*</sup>

<sup>a</sup> International Joint Research Center for Biomass Materials, Yunnan Province Key  
Lab of Wood Adhesives and Glued Products, Southwest Forestry University,  
Kunming 650224, China

<sup>b</sup> Key Laboratory for Forest Resources Conservation and Utilization in the Southwest  
Mountains, Ministry of Education, Southwest Forestry University, Kunming 650224,  
China

**\*Corresponding Authors**

\*E-mail: guanben@swfu.edu.cn (G. Du); long133109070@126.com (L. Yang)

## 1. Characterization Methods

*Differential scanning calorimetry.* DSC of the polymers was obtained using a Perkin-Elmer DSC 7 modified to measure heat flow of photoinitiated polymerizations. Samples were weighed into an aluminum DSC pan and placed into the sample holder without a lid, where the samples were held isothermally at 20 °C under a 20 mL min<sup>-1</sup> flow of nitrogen.

*Thermogravimetric analysis.* TGA was performed using a TA Instruments Q50 thermogravimetric analyzer with a ceramic pan. Samples were held isothermally at 30 °C for five minutes and heated at 10 °C min<sup>-1</sup> from 30 to 800 °C.

*Fourier Transform Infrared Spectrophotometry.* The ATR-FTIR spectra were performed on a Thermo Scientific Nicolet iS50 Fourier transform infrared spectrophotometer equipped with diamond crystal/built-in all-reflective diamond ATR. The spectra were recorded over a frequency range of 4000–400 cm<sup>-1</sup> directly on polymers.

*X-ray photoelectron spectroscopy.* XPS measurements were carried out by using a Thermo ESCALAB 250 spectrometer with a twin anode Al K $\alpha$  (1486.6 eV) X-ray source.

*Nuclear Magnetic Resonance.* <sup>1</sup>H NMR and <sup>13</sup>C NMR measurements were performed on a Varian-Inova (600 MHz) spectrometer at room temperature. Chemical shifts are reported in parts per million ( $\delta$ ) relative to TMS as the internal reference. The polymer samples were dissolved in CDCl<sub>3</sub> at a concentration of 5 mg mL<sup>-1</sup>.

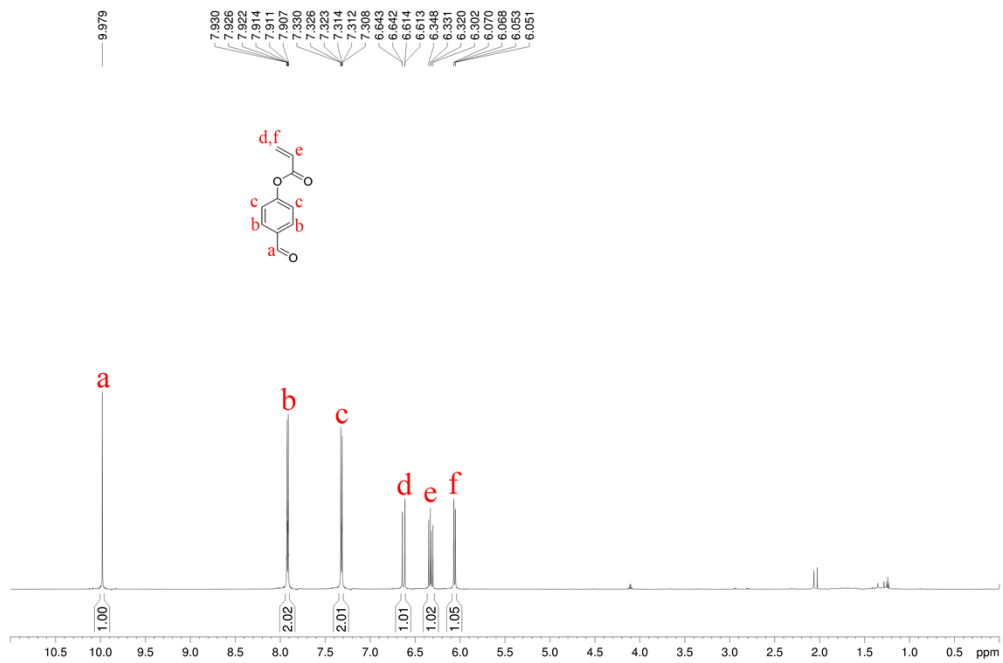

**Figure S1.**  $^1\text{H}$  NMR spectrum (600 MHz,  $\text{CDCl}_3$ , rt) of FPA

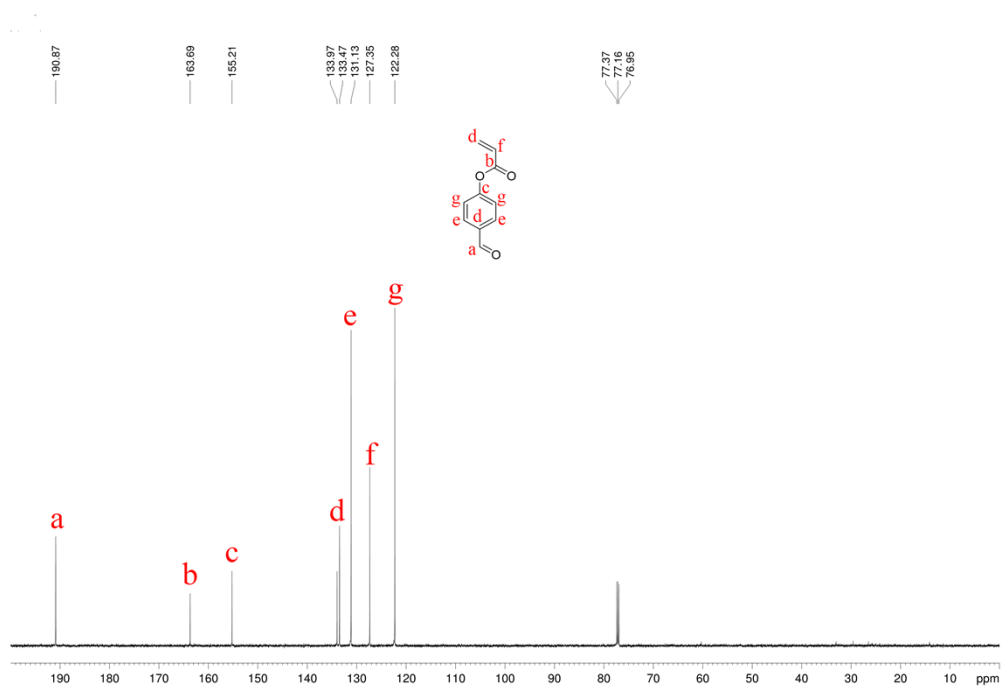

**Figure S2.**  $^{13}\text{C}$  NMR spectrum (150 MHz,  $\text{CDCl}_3$ , rt) of FPA

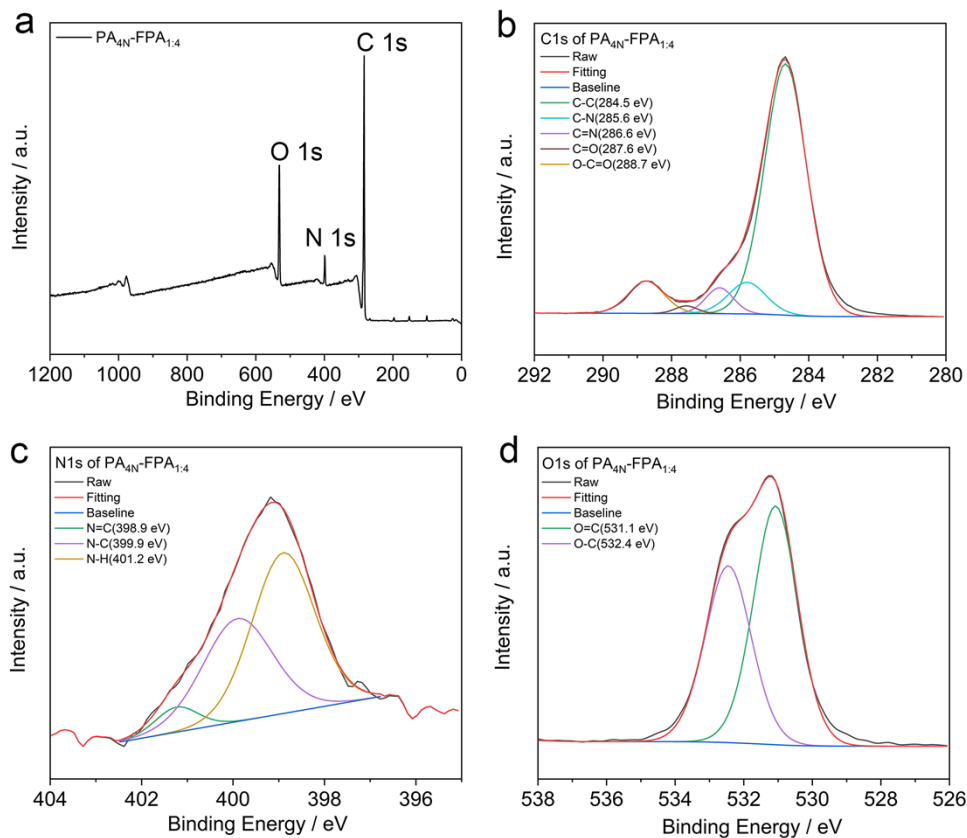

**Figure S3.** (a) XPS measurement spectra of  $\text{PA}_{4\text{N}}\text{-FPA}_{1.4}$ . (b) C 1s high-resolution spectrum of  $\text{PA}_{4\text{N}}\text{-FPA}_{1.4}$ . (c) N 1s high-resolution spectrum of  $\text{PA}_{4\text{N}}\text{-FPA}_{1.4}$ . (d) O 1s high-resolution spectrum of  $\text{PA}_{4\text{N}}\text{-FPA}_{1.4}$ .

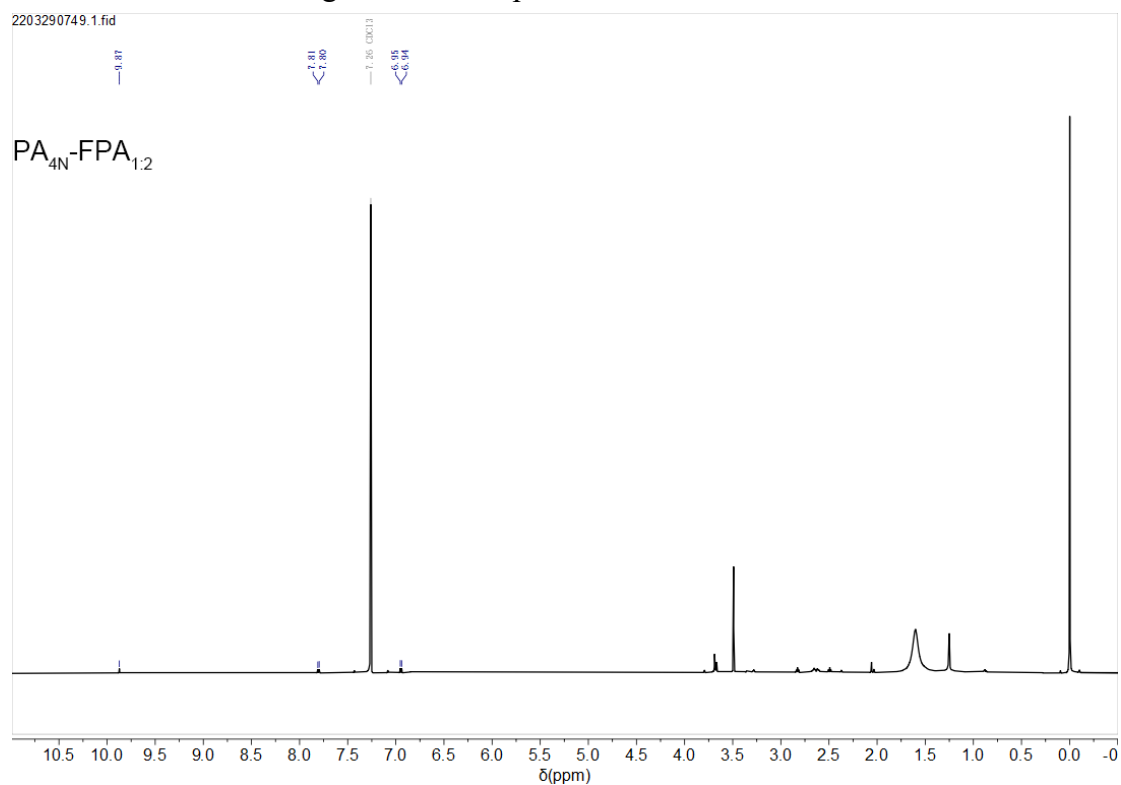

**Figure S4.**  $^1\text{H}$  NMR spectrum (600 MHz,  $\text{CDCl}_3$ , rt) of  $\text{PA}_{4\text{N}}\text{-FPA}_{1.2}$

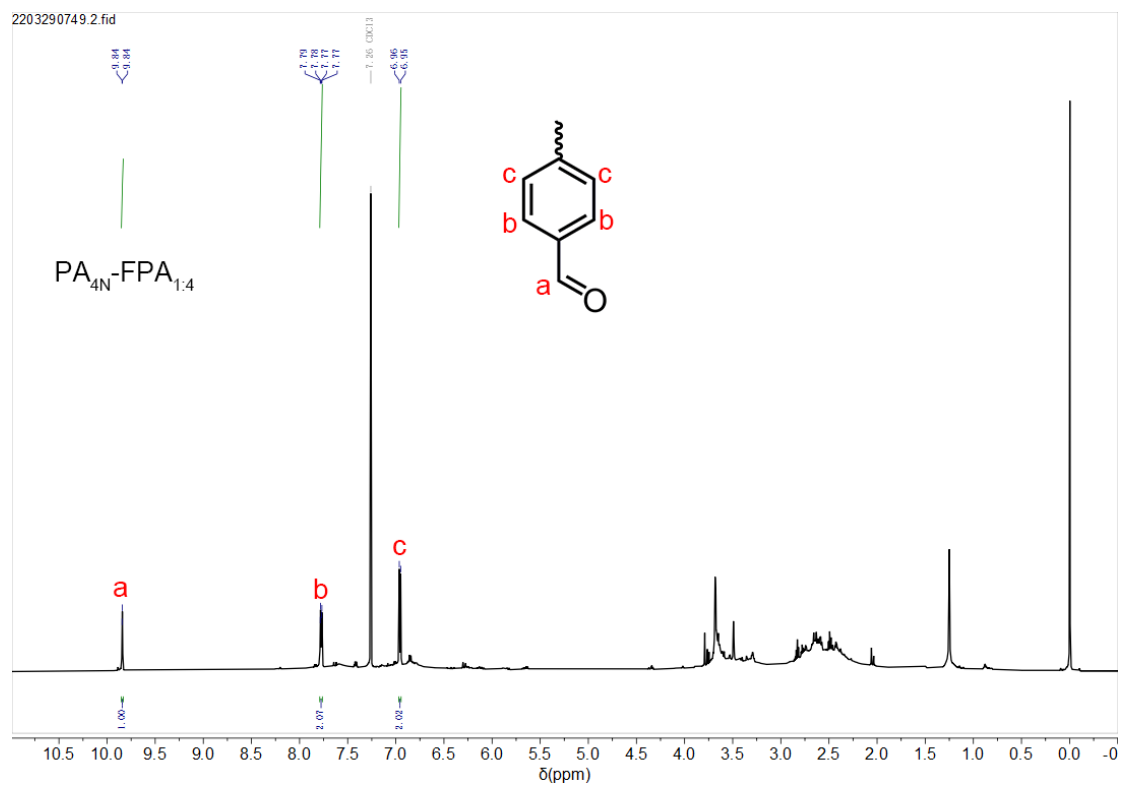

Figure S5. <sup>1</sup>H NMR spectrum (600 MHz, CDCl<sub>3</sub>, rt) of PA<sub>4N</sub>-FPA<sub>1:4</sub>

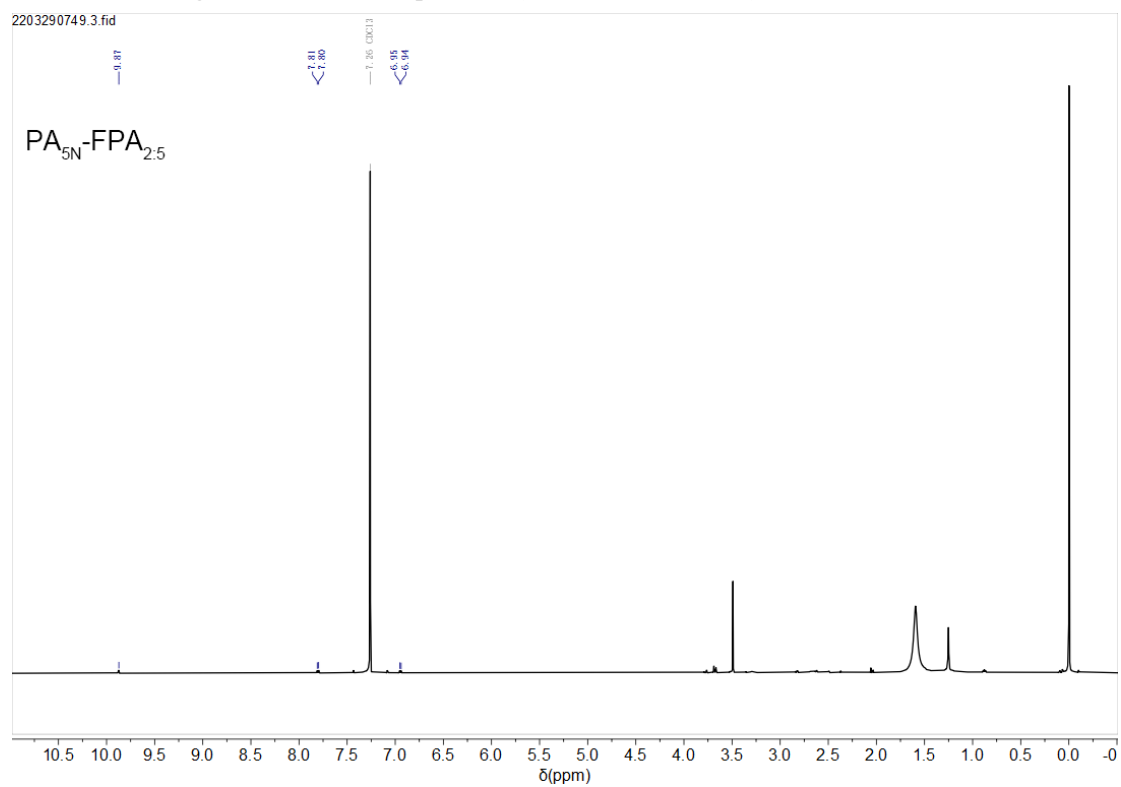

Figure S6. <sup>1</sup>H NMR spectrum (600 MHz, CDCl<sub>3</sub>, rt) of PA<sub>5N</sub>-FPA<sub>2:5</sub>

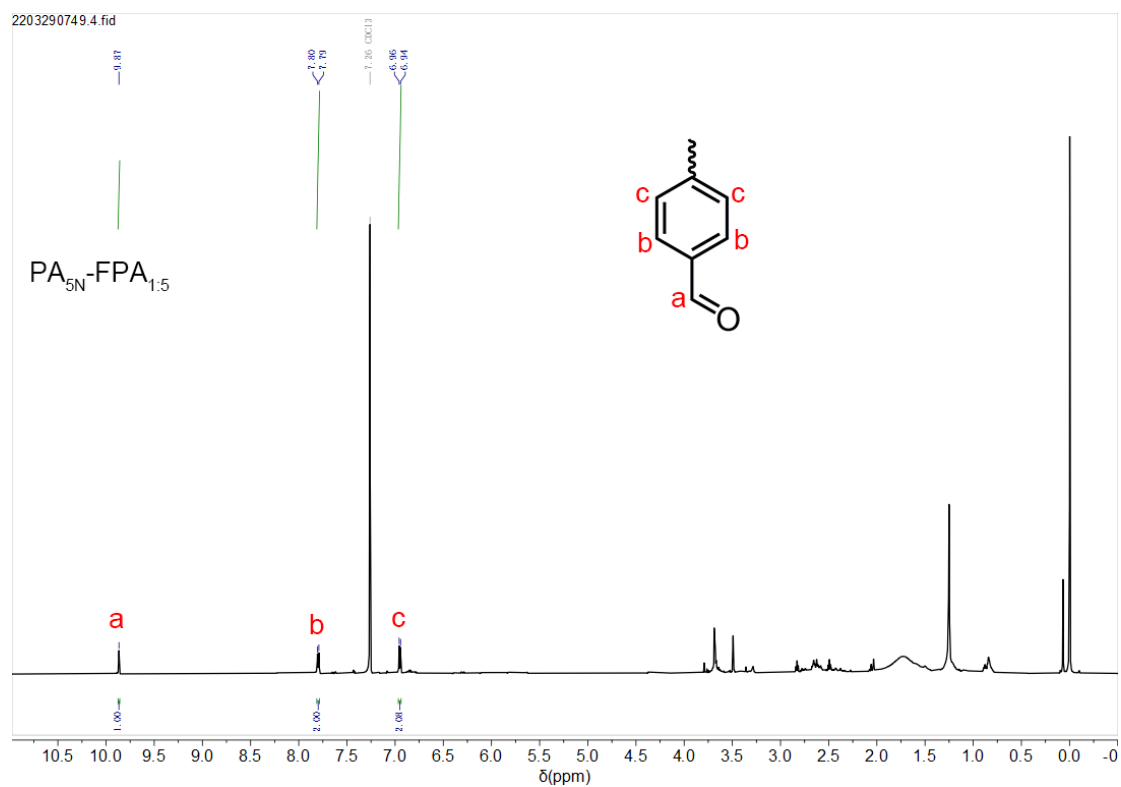

Figure S7. <sup>1</sup>H NMR spectrum (600 MHz, CDCl<sub>3</sub>, rt) of PA<sub>5N</sub>-FPA<sub>1:5</sub>

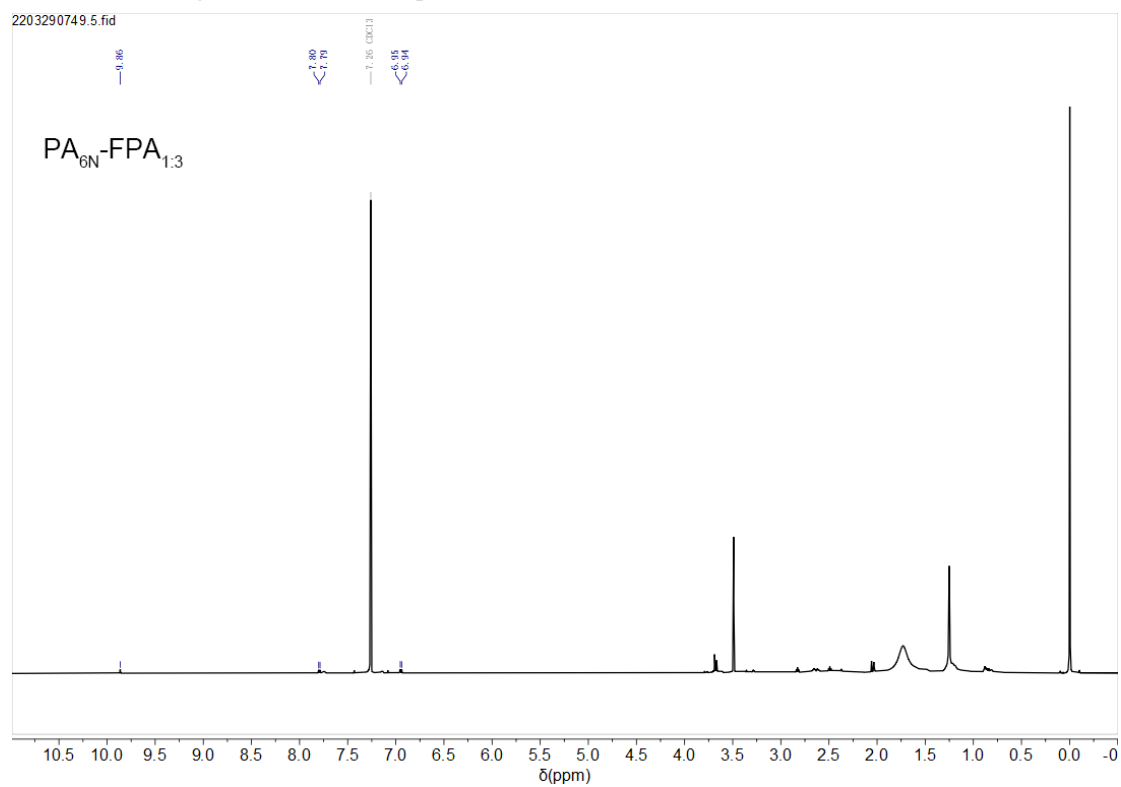

Figure S8. <sup>1</sup>H NMR spectrum (600 MHz, CDCl<sub>3</sub>, rt) of PA<sub>6N</sub>-FPA<sub>1:3</sub>

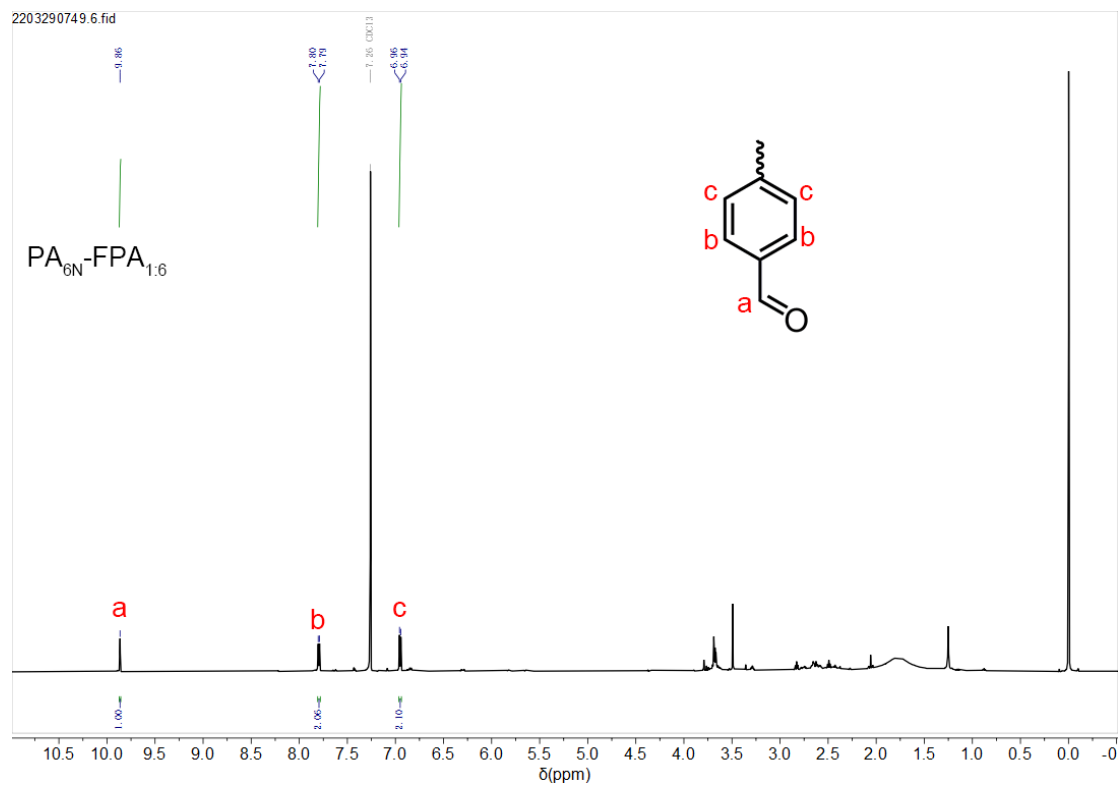

Figure S9. <sup>1</sup>H NMR spectrum (600 MHz, CDCl<sub>3</sub>, rt) of PA<sub>6N</sub>-FPA<sub>1:6</sub>

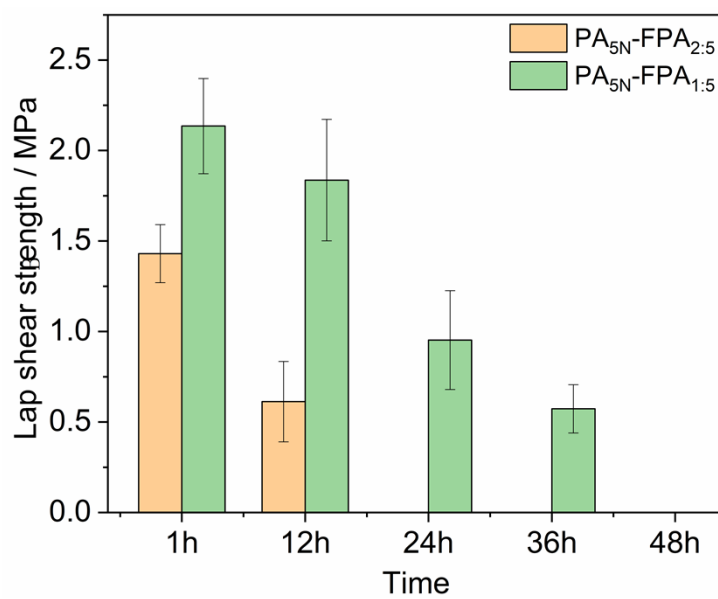

Figure S10. The adhesion strength of FPA-PA adhesives soaked in water.

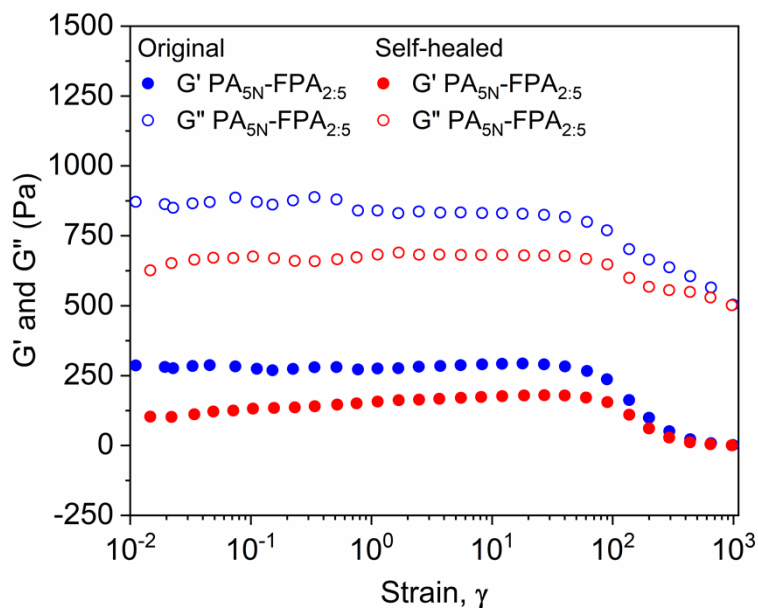

Figure S11.  $^1\text{H}$  NMR spectrum

Table S1. The adhesion strength (MPa) of FPA-PA adhesives on different substrates

| Adhesives                                | Steel      | Al         | Glass      | PVC        | PTFE       |
|------------------------------------------|------------|------------|------------|------------|------------|
| PA <sub>4N</sub> -<br>FPA <sub>1:2</sub> | 1.6 (0.13) | 1.2 (0.23) | 0.7 (0.05) | 0.9 (0.05) | 0.3 (0.01) |
| PA <sub>4N</sub> -<br>FPA <sub>1:4</sub> | 2.4 (0.21) | 1.0 (0.16) | 1.1 (0.08) | 1.2 (0.03) | 0.3 (0.03) |
| PA <sub>5N</sub> -<br>FPA <sub>2:5</sub> | 1.8 (0.09) | 1.3 (0.17) | 1.0 (0.07) | 1.2 (0.04) | 0.3 (0.02) |
| PA <sub>5N</sub> -<br>FPA <sub>1:5</sub> | 2.2 (0.11) | 1.2 (0.2)  | 1.4 (0.1)  | 1.3 (0.06) | 0.3 (0.02) |
| PA <sub>6N</sub> -<br>FPA <sub>1:3</sub> | 2.0 (0.05) | 1.7 (0.09) | 1.1 (0.08) | 1.3 (0.03) | 0.4 (0.03) |
| PA <sub>6N</sub> -<br>FPA <sub>1:6</sub> | 2.3 (0.12) | 1.3 (0.13) | 1.4 (0.06) | 1.1 (0.02) | 0.3 (0.03) |

\*The data in parentheses represent the standard deviation.

Table S2. The contact angle of water and diiodomethane on different substrates.

| Substrates | Contact angle / (°) |               |
|------------|---------------------|---------------|
|            | Water               | Diiodomethane |
| Glass      | 34.2 (0.80)         | 40.4 (0.65)   |



|        |             |             |
|--------|-------------|-------------|
| PVC    | 48.4 (0.38) | 47.7 (1.12) |
| Wood   | 64 (0.63)   | 10 (2.33)   |
| Bamboo | 22.6 (3.39) | 37.3 (0.92) |
| Steel  | 55.3 (3.2)  | 43.6 (1.73) |
| Al     | 67.6 (1.31) | 54.4 (1.16) |

\*The measurement results are the average of six samples, and the data in parentheses represent the standard deviation.

**Table S3.** The surface energy of different substrates.

| Substrates | Dispersion force<br>(J/m <sup>2</sup> ) | Polarity forces<br>(J/m <sup>2</sup> ) | Surface energy<br>(J/m <sup>2</sup> ) |
|------------|-----------------------------------------|----------------------------------------|---------------------------------------|
| Glass      | 26.3                                    | 35.6                                   | 61.9                                  |
| PVC        | 24.6                                    | 27.5                                   | 52.1                                  |
| Wood       | 43.3                                    | 9.2                                    | 52.5                                  |
| Bamboo     | 26.5                                    | 41.4                                   | 67.9                                  |
| Steel      | 28.1                                    | 20.6                                   | 48.7                                  |
| Al         | 24.4                                    | 14.5                                   | 38.9                                  |
